# Supplementary material
Source: PubMed Central journal article supplement (PMC2885140)
Supplement: NIHMS196765-supplement-sup.pdf [file NIHMS196765-supplement-sup.pdf]

## Supplemental data

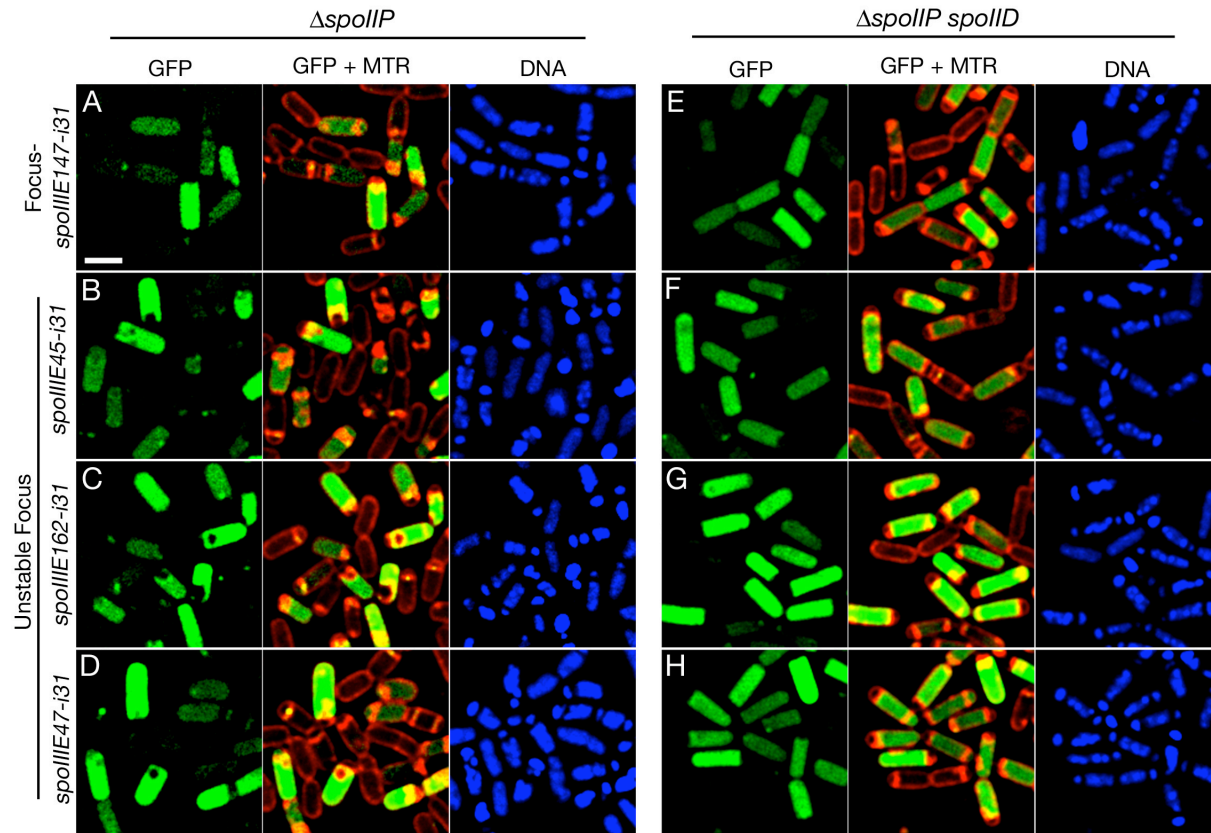

**Figure S1: Engulfment mutants rescue the GFP diffusion defect in SpoIIIE assembly mutants.** Images were collected at  $t_3$ , with membranes stained with Mitotracker Red and DNA with DAPI (blue). (A) Focus defective insertion *spoIIIE147-i31* in *spoIIP* (KP6149). (B) Unstable focus insertion *spoIIIE45-i31* in *spoIIP* (KP6151). (C) Unstable focus insertion *spoIIIE162-i31* in *spoIIP* (KP6152). (D) Unstable focus insertion *spoIIIE47-i31* in *spoIIP* (KP6153). (E) Focus defective *spoIIIE147-i31* in *spoIIP spoIID* (KP6176). (F) Unstable focus insertion *spoIIIE45-i31* in *spoIIP spoIID* (KP6177). (G) Unstable focus insertion *spoIIIE162-i31* in *spoIIP spoIID* (KP6178). (H) Unstable focus insertion *spoIIIE47-i31* in *spoIIP spoIID* (KP6179). For each of these mutant proteins at  $t_3$ , the *spoIIP* mutation improved the ability of the protein to block GFP diffusion (by about 50%), while introducing both *spoIIP* and *spoIID* mutations almost completely rescued the diffusion defect (by about 97%, Table S1). Thus, septal peptidoglycan is sufficient to prevent GFP diffusion in *spoIIIE* mutants that are completely or partially defective in focus assembly. Scale bar in A is 2  $\mu\text{m}$ .

**Table S1: GFP diffusion in engulfment mutant backgrounds**

| <i>spoIIIE</i> mutant                   | Percent sporangia with GFP confined to mother cell |     |                      |                                     |
|-----------------------------------------|----------------------------------------------------|-----|----------------------|-------------------------------------|
|                                         |                                                    |     | + <i>spoIIP::tet</i> | + <i>spoIIP::tet, spoIID::Tn917</i> |
| wild type                               | $t_2$                                              | 100 | 99                   | 99                                  |
|                                         | $t_3$                                              | 100 | 98                   | 98                                  |
| <i>spoIIIE36</i>                        | $t_2$                                              | 97  | 97                   | 99                                  |
|                                         | $t_3$                                              | 100 | 98                   | 98                                  |
| $\Delta$ <i>spoIIIE</i>                 | $t_2$                                              | 0   | 62                   | 97                                  |
|                                         | $t_3$                                              | 0   | 48                   | 95                                  |
| Focus –<br><i>spoIIIE147-i31</i>        | $t_2$                                              | 37  | 68                   | 93                                  |
|                                         | $t_3$                                              | 7   | 46                   | 95                                  |
| Unstable Focus<br><i>spoIIIE45-i31</i>  | $t_2$                                              | 69  | 81                   | 97                                  |
|                                         | $t_3$                                              | 55  | 74                   | 98                                  |
| Unstable Focus<br><i>spoIIIE162-i31</i> | $t_2$                                              | 67  | 91                   | 98                                  |
|                                         | $t_3$                                              | 35  | 73                   | 97                                  |
| Unstable Focus<br><i>spoIIIE47-i31</i>  | $t_2$                                              | 40  | 73                   | 96                                  |
|                                         | $t_3$                                              | 18  | 56                   | 97                                  |

An average of 297 sporangia was scored for each strain at each time point.

**Table S2: Strains used in this study**

| <b>Strain</b> | <b>Genotype</b>                                                                                                                                                                   | <b>Source</b>               |
|---------------|-----------------------------------------------------------------------------------------------------------------------------------------------------------------------------------|-----------------------------|
| KP92          | <i>spoIIIE36</i>                                                                                                                                                                  | Wu and Errington, 1994      |
| KP141         | $\Delta$ <i>spoIIIE::spc</i>                                                                                                                                                      | Pogliano <i>et al.</i> 1997 |
| KP514         | <i>cotE-gfp<math>\Omega</math>kan, spoIIP::tet</i>                                                                                                                                | This study                  |
| KP723         | <i>spoIIIE36, cotE-gfp<math>\Omega</math>kan</i>                                                                                                                                  | Sharp and Pogliano, 1999    |
| KP725         | <i>spoIIIE::spec, cotE-gfp<math>\Omega</math>kan</i>                                                                                                                              | Sharp and Pogliano, 1999    |
| KP6149        | <i>amyE::spoIIIE147-i31-'spoIIIE-gfp<math>\Omega</math>cat, <math>\Delta</math>spoIIIE::spc, cotE-gfp<math>\Omega</math>kan, spoIIP::tet</i>                                      | This study                  |
| KP6151        | <i>amyE::spoIIIE45-i31-'spoIIIE-gfp<math>\Omega</math>cat, <math>\Delta</math>spoIIIE::spc, cotE-gfp<math>\Omega</math>kan, spoIIP::tet</i>                                       | This study                  |
| KP6152        | <i>amyE::spoIIIE162-i31-'spoIIIE-gfp<math>\Omega</math>cat, <math>\Delta</math>spoIIIE::spc, cotE-gfp<math>\Omega</math>kan, spoIIP::tet</i>                                      | This study                  |
| KP6153        | <i>amyE::spoIIIE47-i31-'spoIIIE-gfp<math>\Omega</math>cat, <math>\Delta</math>spoIIIE::spc, cotE-gfp<math>\Omega</math>kan, spoIIP::tet</i>                                       | This study                  |
| KP6174        | <i>spoIIIE36, cotE-gfp<math>\Omega</math>kan, spoIIP::tet</i>                                                                                                                     | This study                  |
| KP6175        | <i>spoIIIE::spec, cotE-gfp<math>\Omega</math>kan, spoIIP::tet</i>                                                                                                                 | This study                  |
| KP6176        | <i>amyE::spoIIIE147-i31-'spoIIIE-gfp<math>\Omega</math>cat, <math>\Delta</math>spoIIIE::spc, cotE-gfp<math>\Omega</math>kan, spoIIP::tet, spoIID::Tn917<math>\Omega</math>mls</i> | This study                  |
| KP6177        | <i>amyE::spoIIIE45-i31-'spoIIIE-gfp<math>\Omega</math>cat, <math>\Delta</math>spoIIIE::spc, cotE-gfp<math>\Omega</math>kan, spoIIP::tet, spoIID::Tn917<math>\Omega</math>mls</i>  | This study                  |
| KP6178        | <i>amyE::spoIIIE162-i31-'spoIIIE-gfp<math>\Omega</math>cat, <math>\Delta</math>spoIIIE::spc, cotE-gfp<math>\Omega</math>kan, spoIIP::tet, spoIID::Tn917<math>\Omega</math>mls</i> | This study                  |
| KP6179        | <i>amyE::spoIIIE47-i31-'spoIIIE-gfp<math>\Omega</math>cat, <math>\Delta</math>spoIIIE::spc, cotE-gfp<math>\Omega</math>kan, spoIIP::tet, spoIID::Tn917<math>\Omega</math>mls</i>  | This study                  |
| KP6180        | <i>cotE-gfp<math>\Omega</math>kan, spoIIP::tet, spoIID::Tn917<math>\Omega</math>mls</i>                                                                                           | This study                  |
| KP6181        | <i>spoIIIE36, cotE-gfp<math>\Omega</math>kan, spoIIP::tet, spoIID::Tn917<math>\Omega</math>mls</i>                                                                                | This study                  |
| KP6182        | <i><math>\Delta</math>spoIIIE::spec, cotE-gfp<math>\Omega</math>kan, spoIIP::tet, spoIID::Tn917<math>\Omega</math>mls</i>                                                         | This study                  |
